# Supplementary material for: Mitochondrial arginase-2 is essential for IL-10 metabolic reprogramming of inflammatory macrophages
Source: PubMed Central journal article supplement (PMC7936006; doi:10.1038/s41467-021-21617-2), 2021-03-05
Supplement: 41467_2021_21617_MOESM1_ESM.pdf [file 41467_2021_21617_MOESM1_ESM.pdf]

Supplementary Information for:

**Mitochondrial arginase-2 is essential for IL-10 metabolic reprogramming of inflammatory macrophages**

Jennifer K. Dowling<sup>1,2,3,4,10</sup>, Remsha Afzal<sup>1,10</sup>, Linden J. Gearing<sup>2,4</sup>, Mariana P. Cervantes-Silva<sup>1</sup>, Stephanie Annett<sup>1</sup>, Gavin M. Davis<sup>6</sup>, Chiara De Santi<sup>1</sup>, Nadine Assmann<sup>6,7</sup>, Katja Dettmer<sup>8</sup>, Daniel J. Gough<sup>4,5</sup>, Glenn R. Bantug<sup>7,9</sup>, Fidinny I. Hamid<sup>4,5</sup>, Frances K. Nally<sup>1</sup>, Conor P. Duffy<sup>1</sup>, Aoife L. Gorman<sup>6</sup>, Alex M. Liddicoat<sup>6</sup>, Ed C. Lavelle<sup>6</sup>, Christoph Hess<sup>7,9</sup>, Peter J. Oefner<sup>8</sup>, David K. Finlay<sup>6</sup>, Paul J. Hertzog<sup>2,4</sup>, Annie M. Curtis<sup>1</sup>, Gavin P. Davey<sup>6</sup>, Tracy Robson<sup>1</sup>, Bryan R.G. Williams<sup>4,5</sup>, and Claire E. McCoy<sup>1,3,4,5\*\*</sup>

1 School of Pharmacy and Biomolecular Sciences, Royal College of Surgeons in Ireland, Dublin 2, Ireland.

2 Centre for Innate Immunity and Infectious Diseases, Hudson Institute of Medical Research, Clayton, VIC, Australia

3 FutureNeuro, SFI Research Centre, Dublin 2, Ireland.

4 Department of Molecular and Translational Science, Monash University, Clayton, VIC, Australia.

5 Centre for Cancer Research, Hudson Institute of Medical Research, Clayton, VIC, Australia.

6 School of Biochemistry and Immunology, Trinity College Dublin, Dublin, Ireland.

7 Immunobiology Laboratory, Department of Biomedicine, University Hospital Basel, Basel, Switzerland.

8 Institute of Functional Genomics, University of Regensburg, Regensburg, Germany.

9 Cambridge Institute of Therapeutic Immunology & Infectious Disease, Department of Medicine, University of Cambridge, Cambridge, UK.

10 These authors contributed equally.

\*\* Lead Contact and corresponding author

**Contents:**

Supplementary Figure 1

Supplementary Figure 2

Supplementary Figure 3

Supplementary Figure 4

Supplementary Figure 5

Supplementary Table 1 - List of used antibodies, bacterial strains and cell lines

Supplementary Table 2 - List of primers

Supplementary Table 3 - List of used chemical reagents

Supplementary Table 4 – List of used commercial kits

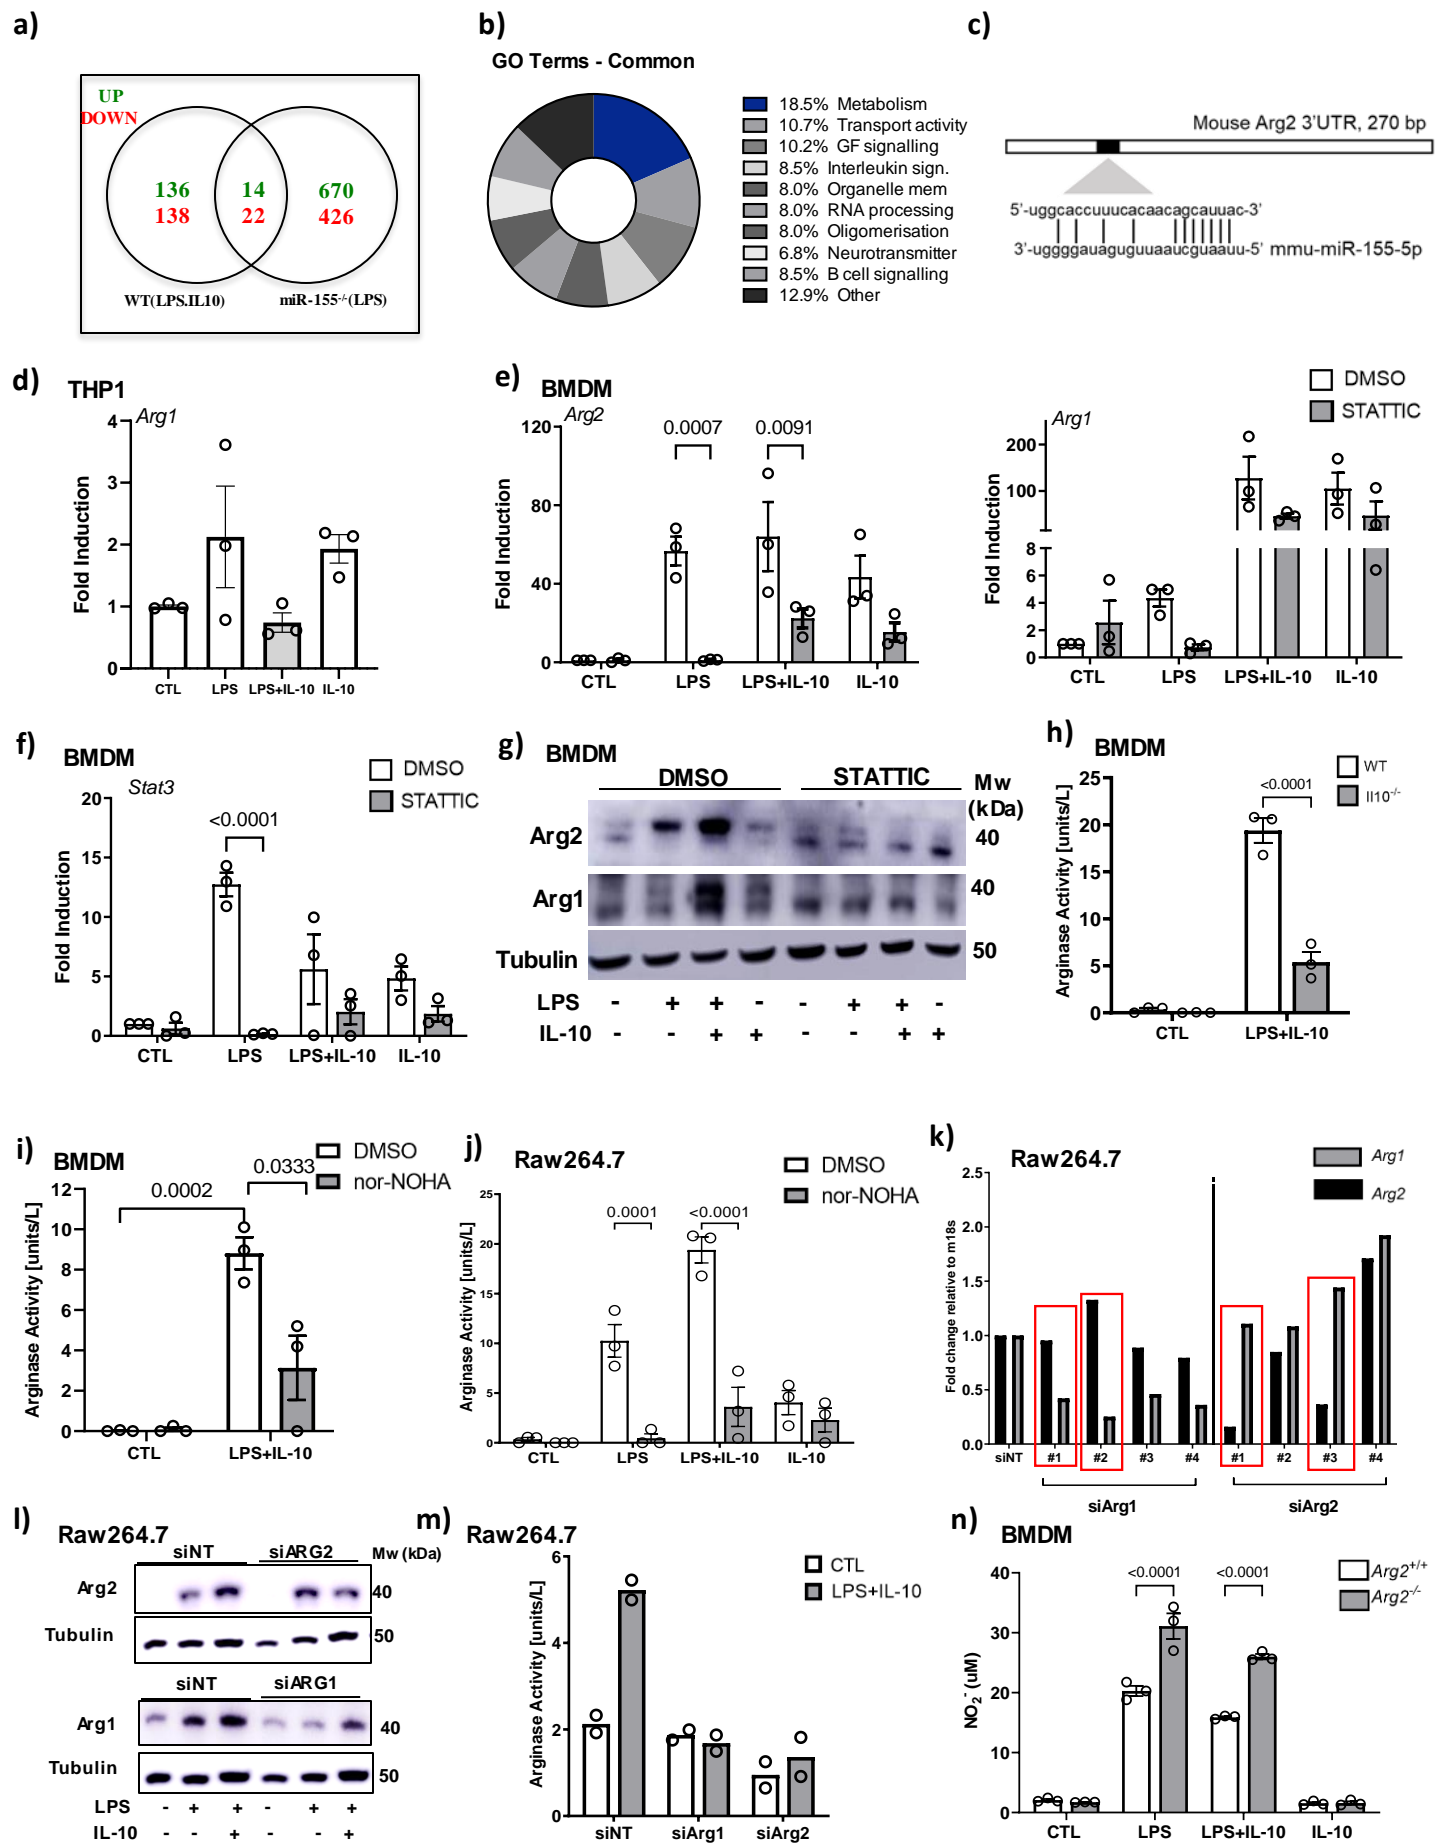

**Supplementary Figure 1. Arginase-2 is an IL-10/miR-155 regulated gene.** (a) Venn diagram illustrating gene number changes when WT(LPS) genes were compared to WT(LPS+IL10) and *miR-155*<sup>-/-</sup>(LPS) genes. (b) Common gene ontology (GO) terms identified using gene set enrichment analysis (ROMER) on WT(LPS+IL10) and *miR-155*<sup>-/-</sup> (LPS) anti-inflammatory genes. (c) The miR-155 binding site (black box) in the 3'-UTR of mouse *Arg-2* mRNA. The sequence of mouse miR-155 is shown aligned with its predicted target site in the 3'-UTR of *Arg2* mRNA. (d-n) Cells were left unstimulated, or stimulated with LPS, LPS+IL-10, or IL-10 alone for 24 hours (or for 8 hours after STATTIC pre-treatment in (e-g)): (d) RT-PCR analysis of *Arg1* mRNA levels in THP-1 cells. Data points represent n=3 independent experiments. (e) RT-PCR analysis of (e) *Arg2*, *Arg1*, (f) *Stat3* mRNA levels, and (g) *Arg2*, *Arg1* protein levels in BMDM. (e,f) Data points represent average of technical triplicates over n=3 independent experiments. (g) Representative of two independent experiments. (h-j) Urea measured as output of arginase activity (n=3 biological independent experiments) in (h) WT (*Il10*<sup>+/+</sup>) vs *Il10*<sup>-/-</sup> BMDM, (i) DMSO vs nor-NOHA treated BMDM, (j) DMSO vs nor-NOHA treated Raw 264.7 cells. (k-m) Raw 264.7 macrophages were transfected with different Accell<sup>®</sup> siRNA for 48 hours against *Arg1* and *Arg2* (siArg1, siArg2) and compared to non-targeting siRNA (siNT)). Samples were then stimulated with LPS+IL-10 for 24 hours, and looked at for: (k) *Arg1* and *Arg2* mRNA. siRNA shown in red boxes were used for later knockdown experiments (n=1 independent experiment to test for siRNA efficacy). (l) Protein expression of *Arg1* and *Arg2* in Raw 264.7. Representative of two independent experiments. (m) Urea as output of arginase activity. Data points show average of technical triplicates over n=2 independent experiments. (n) NO production in *Arg2*<sup>+/+</sup> vs *Arg2*<sup>-/-</sup> BMDM (n=3 biological experiments). (d-f, k) Data are normalized to *m18s*, and expressed as fold change relative to controls (d-f, h-j, n) Data shown is mean with error bars representing +/- SEM. Data is compared using two-way ANOVA with Sidak's multiple comparison post-hoc test. P-values are indicated on graphs wherever statistically significant.

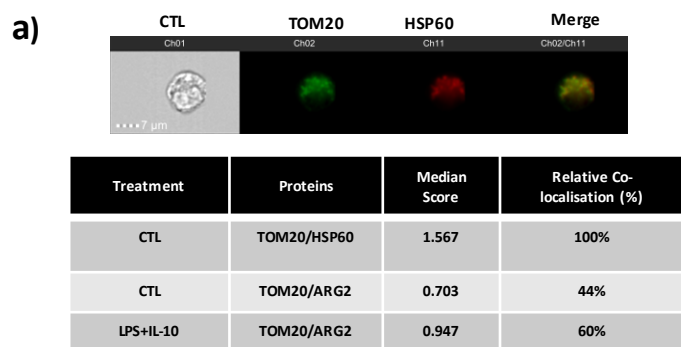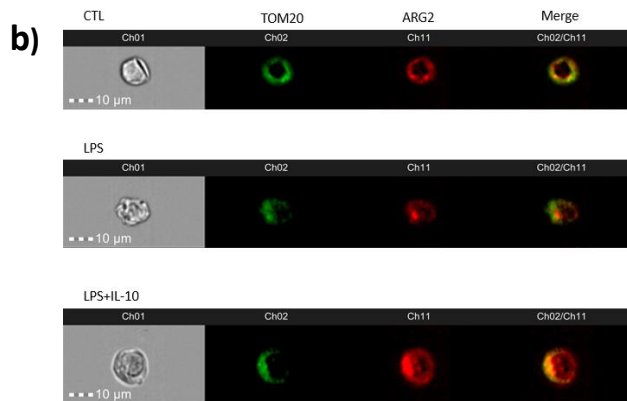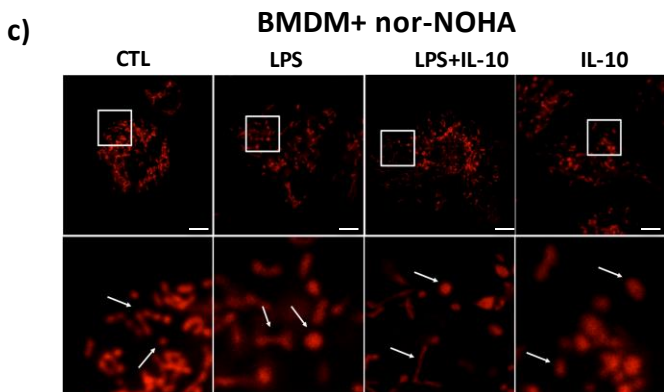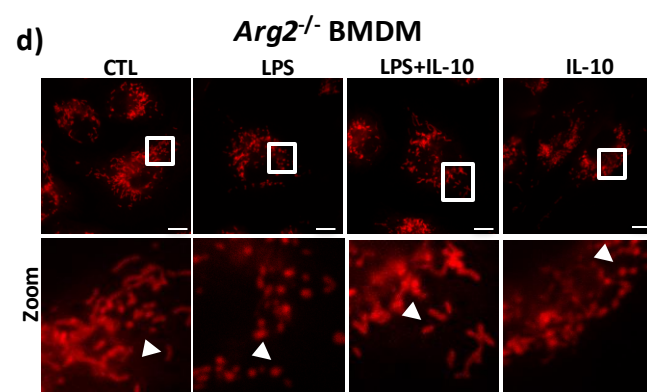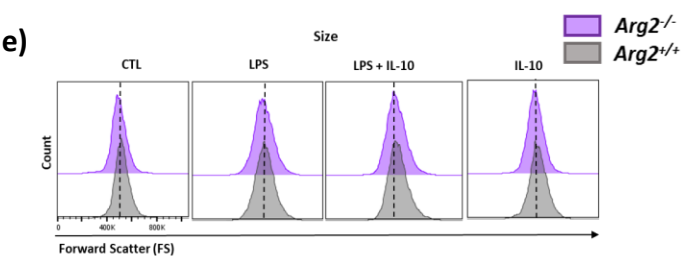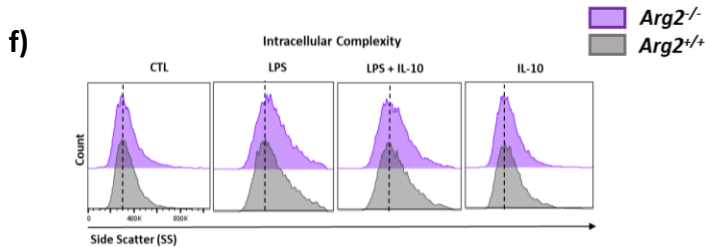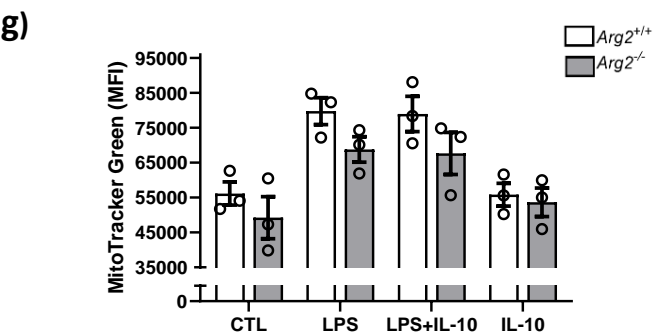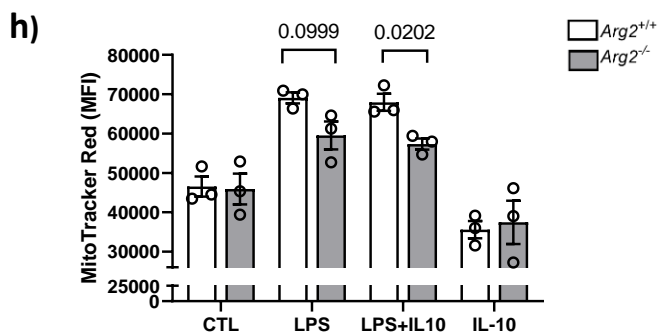

**Supplementary Figure 2. Arginase-2 has limited impact on mitochondrial integrity. (a)** ImageStream representative image showing co-localization levels of two mitochondrial proteins Tom20 and Hsp60 in unstimulated BMDM samples. Representative images shown from ~2000 events. Channels shown are bright field (Ch01), Tom20 (green/Ch02), Hsp60 (red/Ch11), and a merge of Tom20 and Hsp60. Original magnification,  $\times 60$ . Table shows median colocalization index shown with reference index set at 100% for Tom20/Hsp60. **(b)** ImageStream representative image showing co-localization levels of Tom20 and Arg2 in unstimulated (CTL) Raw264.7 cells, or cells stimulated with LPS or LPS+IL-10. Representative image shown from ~1000 events and repeated as three independent experiments. Channels shown are bright field (Ch01), Tom20 (green/Ch02), Arg2 (red/Ch11), and a merge of Tom20 and Arg2. Original magnification,  $\times 60$ . **(c)** BMDM pre-treated with 150  $\mu\text{M}$  nor-NOHA, and **(d)** *Arg2*<sup>-/-</sup> were left unstimulated (CTL), or treated with LPS, LPS+IL-10 or IL-10 alone for 24h (full stimulation panel from Fig.2 e-f) followed by Mitotracker Red CMXRos staining for 30 min. Mitochondrial morphology was observed by confocal microscopy. Lower bottom panels show a higher magnification of the image within the white square in panels. Arrows show mitochondrial fusion and fission. **(c,d)** Data is representative of n=3 independent biological experiments. **(e-h)** *Arg2*<sup>+/+</sup> and *Arg2*<sup>-/-</sup> BMDM were untreated, or stimulated with LPS, LPS+IL-10, or IL-10 alone for 24 hours, and analysed by flow cytometry: **(e)** Representative histograms of total mitochondrial size, and **(f)** Intracellular complexity; **(g)** Mitochondrial mass by staining cells with MitoTracker Green as depicted by MFI quantification. **(h)** Membrane potential ( $\Delta\Psi_m$ ) by staining cells with  $\Delta\Psi_m$ -sensitive dye MitoTracker Red as shown by MFI quantification of MitoTracker Red. **(g-h)** Data shown with error bars represents +/- SEM. Data points show three independent biological experiments. Data was analysed using two-tailed t-test with Welch's correction, and p-values for significant results are indicated on graphs.

a) *Il10*<sup>-/-</sup>

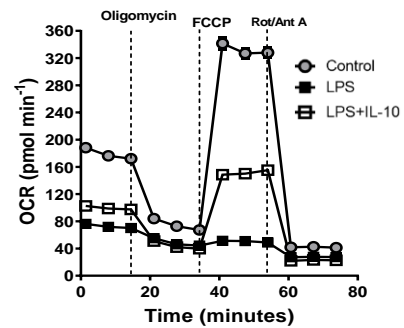

b)

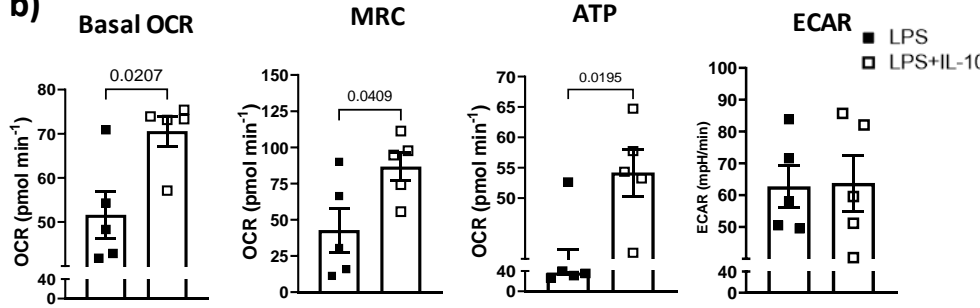

c) Raw264.7

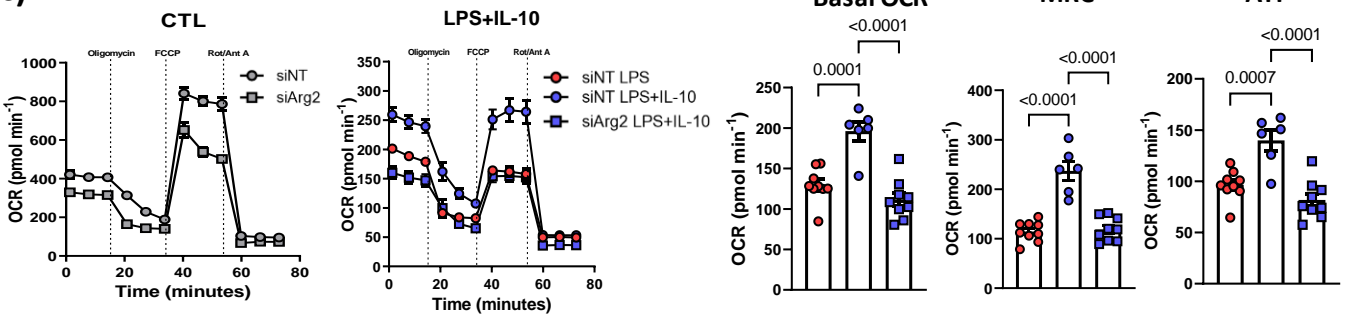

d)

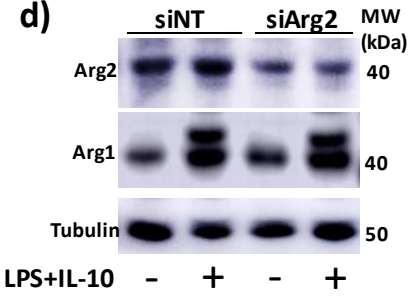

e)

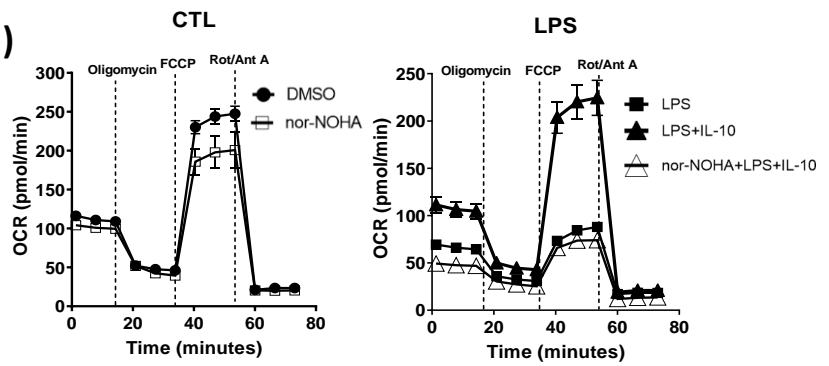

f)

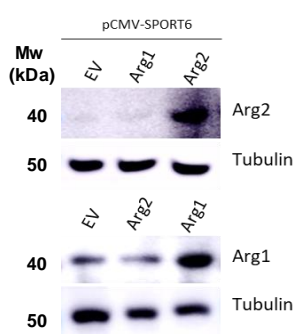

g)

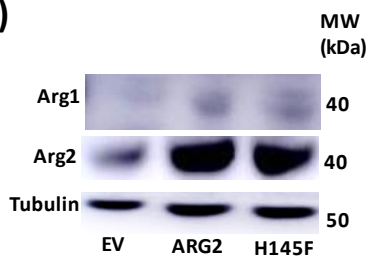

**Supplementary Figure 3. Arginase-2 enhances OxPhos at the mitochondria in IL-10 treated inflammatory macrophages.** **(a)** Representative trace (n=5 biological experiments) showing real-time changes in mitochondrial OCR in *I10<sup>-/-</sup>* BMDM that were left unstimulated, or stimulated with LPS or LPS+IL-10 for 24 h. **(b)** Basal OCR, ATP levels and Basal ECAR of the representative experiment from five biological replicates n=5. **(c)** Representative mitochondrial OCR trace (n=2 independent experiments) in (left) unstimulated (CTL) and (right) LPS/LPS+IL-10 stimulated Raw264.7 cells, 24 hours post stimulation. Cells were either pre-treated with DMSO or with 150  $\mu$ M nor-NOHA for 1 h before addition of IL-10 and/or LPS stimulations. Scatter bar plots show quantitative changes in Raw 264.7 cells transfected with siNT or siArg2, and then stimulated with LPS or LPS+IL-10. Mean basal OCR, maximal respiratory capacity (MRC) and ATP levels are shown as pooled technical triplicates representative of three independent experiments. **(d)** iBMDM macrophages were transfected with Accell<sup>®</sup> siRNA for 72 hours against Arg2 (siArg2) and compared to non-targeting siRNA (siNT) (1  $\mu$ M). Samples were then left unstimulated or stimulated with LPS+IL-10 for a further 24 hours, and looked at for protein expression of Arg2, Arg1, and tubulin as loading control (representative of n=2 independent experiments). **(e)** Representative trace of n=2 independent experiments of mitochondrial OCR in (left) unstimulated (CTL), or (right) LPS/LPS+IL-10 stimulated Raw264.7 cells, 24 hours post stimulation. Cells were either pre-treated with DMSO or with 150  $\mu$ M nor-NOHA for 1 hour before addition of IL-10 and/or LPS stimulations. **(f)** Expression levels of Arg1 and Arg2, with tubulin as loading control, after transfection of pCMV-SPORT6 overexpression plasmids shown by immunoblot. Blot representative of three independent experiments. **(g)** Expression levels of Arg2 and Arg1, with tubulin as loading control, after transfection of respective pCMV-SPORT6 over-expression plasmids: Empty Vector (EV), Arg-2 and H145F are shown by immunoblot. Blot representative of two independent experiments. **(a-e)** Data is presented for all traces and scatter plots as mean  $\pm$  SEM. Data was analyzed with **(b)** two-tailed paired Student's t-test, and **(c)** ordinary one-way ANOVA with Tukey's multiple comparisons post-hoc test, and significant p-values were indicated on graphs.

**a) BMDM**

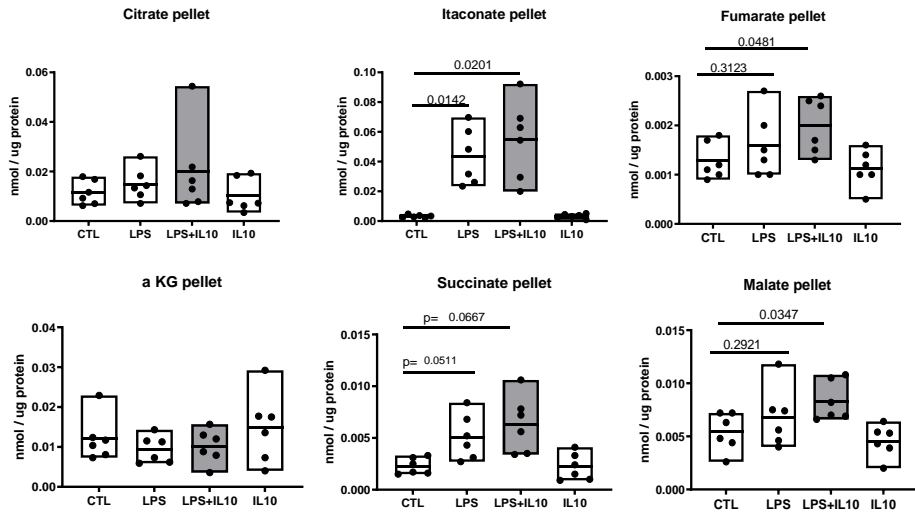

**b)**

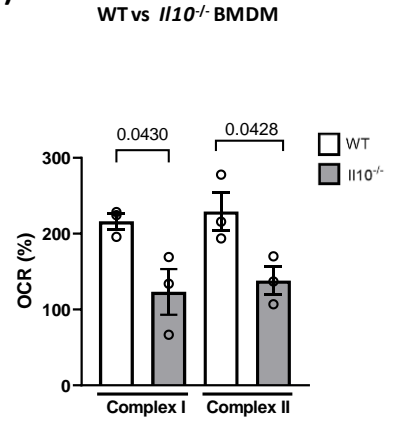

**c) Raw264.7**

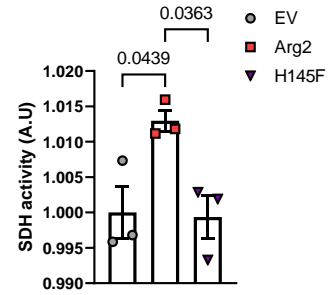

**d) BMDM**

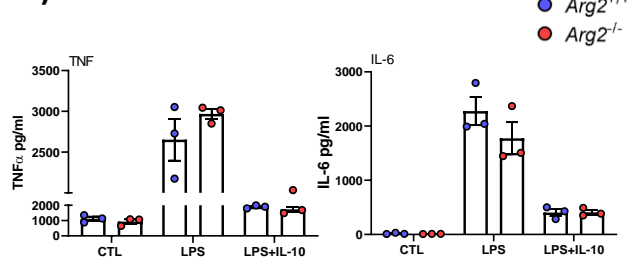

**e)**

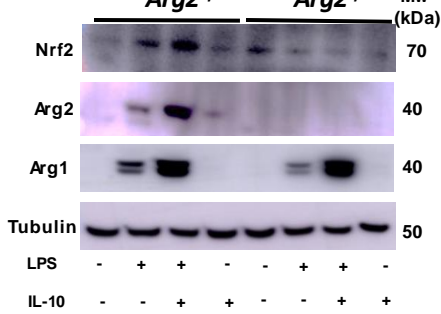

**f) Peritoneal Lavage**

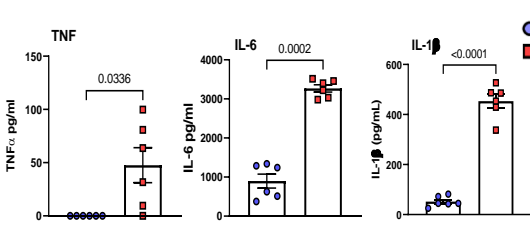

**g) PEC**

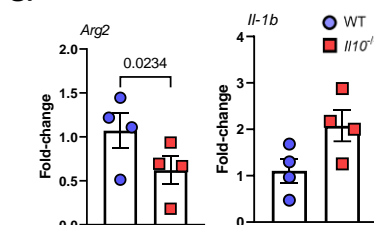

**h) Spleen**

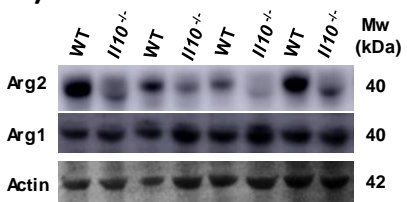

**i) iBMDM: LPS+IL-10**

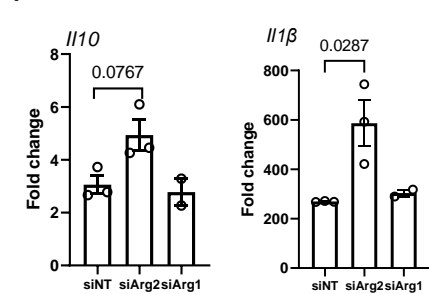

**j) Serum**

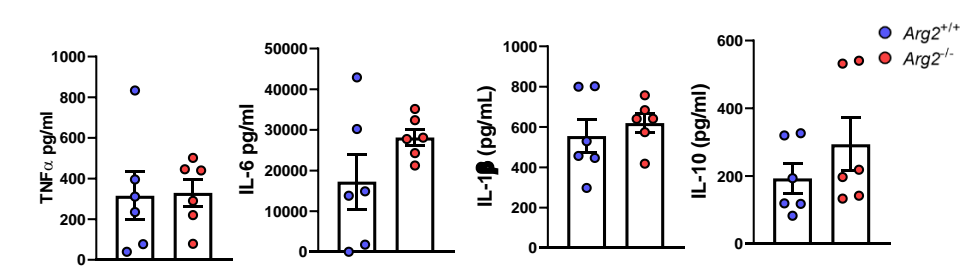



**Supplementary Figure 4. Arginase-2 is important for CII activity and IL-10 regulated IL-1 $\beta$  secretion in inflammatory macrophages.** (a) GC/MS analysis of TCA metabolites in BMDM left untreated (CTL) or stimulated with LPS, LPS+IL-10, or IL-10 for 24 hours. (Biological n=6); (b-d) XFe96 Complex activity assay: Plasma membrane-permeabilized cells were provide with a cocktail of specific substrates to measure complex-II mediated respiratory activity. Representative trace showing respective boost in OCR% after succinate/rotenone+ADP addition: (b) Unstimulated wild type (*Il10*<sup>+/+</sup>) vs *Il10*<sup>-/-</sup> BMDM Complex I and Complex II OCR% comparison (n=3 biological). (c) SDH activity assessed by MTT assay in pCMV-SPORT6 EV, *Arg2*, and H145F transfected Raw264.7 cells. Data points show 3 independent experiments. (d-e) Wild-type (*Arg2*<sup>+/+</sup>) vs *Arg2*<sup>-/-</sup> BMDMs that were either left untreated CTL, or stimulated with LPS, LPS+IL-10 or IL-10 alone for 24 hours were looked for: (d) TNF and IL-6 secretion levels in supernatant (n=3), (e) Protein expression for Nrf2, *Arg2*, *Arg1*, and tubulin (as loading control) via immunoblotting. Representative of three independent experiments. (f-h) *Il10*<sup>+/+</sup> and *Il10*<sup>-/-</sup> C57Bl/6 mice were given i.p injection of LPS at 10 mg/kg for 8 hours and looked at for (f) Peritoneal Lavage cytokine levels (n=6), (g) *Arg2* and *Il-1 $\beta$*  gene expression in peritoneal cells (n=4). (h) *Arg2*, *Arg1*, and tubulin protein levels in spleen. Blot representative of six mice each from *Il10*<sup>+/+</sup> and *Il10*<sup>-/-</sup>. (i) *Il-1 $\beta$*  and *Il-10* gene expression in immortalised BMDM (iBMDM) that were transfected with 1 uM Accell siRNA (siNT vs si*Arg2*) for 48 hours, followed by stimulation with LPS+IL-10 for 24 hours. Data representative of n=3 independent experiments (n=2 for si*Arg1*). (j) WT (*Arg2*<sup>+/+</sup>) and *Arg2*<sup>-/-</sup> C57Bl/6 mice were given i.p injection of LPS at 10 mg/kg for 8 hours and looked at for serum cytokines TNF, IL-6, IL-10 and IL-1 $\beta$  expression levels. (n=6). (a-d, f-g, i-j) Data is presented as mean  $\pm$  SEM. Data was analyzed by (a,c,i) one-way ANOVA with Tukey's multiple comparison post-hoc test; (b,f,g,j) two-tailed t-test. p-values are given on the graphs where statistically significant and/or relevant.

## Supplementary Figure 5

(a)

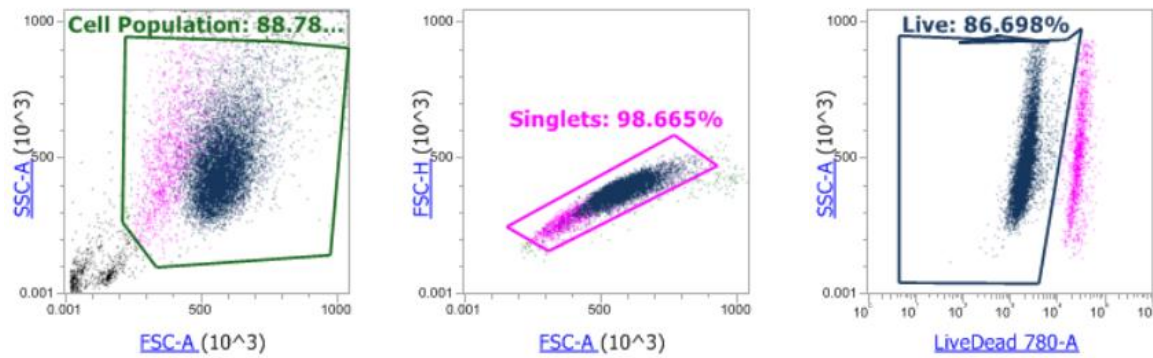

(b)

Time Recorded: 13:28:30

| Name              | Gate            | X Parameter | Y Parameter | Count  | %Total  | %Gated  |
|-------------------|-----------------|-------------|-------------|--------|---------|---------|
| ▢ All Events      | All Events      | N/A         | N/A         | 13,242 | 100.000 | 100.000 |
| ▢ Cell Population | Cell Population | FSC-A       | SSC-A       | 11,757 | 88.786  | 88.786  |
| ▢ Singlets        | Singlets        | FSC-A       | FSC-H       | 11,600 | 87.600  | 98.665  |
| ▢ Live            | Live            | RL3-A       | SSC-A       | 10,057 | 75.948  | 86.698  |

### Supplementary Figure 5: Gating strategy in macrophages

(a) Gating strategy for the analysis of BMDM. Cell gate population, doublet discrimination and live/dead staining. (b) Live events (10,000) were acquired in all experiments, Fig 4j and Supplemental Fig. 2e-f.

Supplementary Table 1. List of Antibodies, bacterial strains, and cell lines.

| REAGENT or RESOURCE                                      | SOURCE                 | IDENTIFIER                       |
|----------------------------------------------------------|------------------------|----------------------------------|
| Antibodies                                               |                        |                                  |
| Arginase-1 (anti-rabbit) (1:1000)                        | Invitrogen             | Cat# PA5-85267,RRID:AB_2792410   |
| Arginase-2 (anti-human) (1:1000)                         | Abcam                  | Cat# ab137069, RRID:AB_2848115   |
| Arginase-2 (anti-mouse) (1:1000) and (1:100 Imagestream) | Invitrogen             | Cat# MA527815 RRID:AB_2735112    |
| Tubulin (anti-rat) (1:8000)                              | Abcam                  | Cat# ab6160, RRID:AB_305328      |
| VDAC1 (anti-rabbit) (1:8000)                             | CST                    | Cat# 4661, RRID:AB_10557420      |
| TOM20 (anti-rabbit) (1:200)                              | CST                    | Cat# 42406 RRID: AB_2687663      |
| HSP60 (anti-rabbit) (1:200)                              | Abcam                  | Cat# ab5478 RRID: AB_304921      |
| HIF-1 $\alpha$ (anti-rabbit) (1:500)                     | CST                    | Cat# 14179, RRID:AB_2622225      |
| Beta Actin (anti-mouse) (1:8000)                         | Sigma                  | Cat# A5441, RRID:AB_476744       |
| NRF2 (anti-rabbit) (1:1000)                              | CST                    | Cat# 12721T RRID: AB_2715528     |
| CD210 (IL-10R) (anti-mouse)                              | BioLegend              | Cat# 112707, RRID:AB_313520      |
| Peroxidase-AffiniPure Goat Anti-Mouse IgG (H + L)        | Jackson ImmunoResearch | Cat#115035003 RRID:AB_10015289   |
| Peroxidase-AffiniPure Goat Anti-Rabbit IgG (H+L)         | Jackson ImmunoResearch | Cat# 111-035-003,RRID:AB_2313567 |
| Peroxidase-AffiniPure Goat Anti-Rat IgG (H+L)            | Jackson ImmunoResearch | Cat# 112-035-003,RRID:AB_2338128 |
| Goat anti-Mouse IgG (H+L), Alexa Fluor Plus 488          | Invitrogen             | Cat# A32723                      |
| Goat anti-Rabbit IgG (H+L), Alexa Fluor Plus 488         | Invitrogen             | Cat# A32731                      |
| Bacterial strains                                        |                        |                                  |
| Subcloning Efficiency™ DH5 $\alpha$ ™ Competent Cells    | Invitrogen             | 18265017                         |
| XL10 Gold E.coli                                         | Agilent                | 210518                           |
| Cell lines                                               |                        |                                  |
| Raw 264.7                                                | ATCC                   | Cat# ATCC TIB-71 RRID:CVCL_0493  |
| L929                                                     | ATCC                   | Cat# ATCC CCL-1 RRID:CVCL_0462   |
| THP-1                                                    | ATCC                   | Cat# TIB-202, RRID:CVCL_0006     |

**Supplementary Table 2. List of primers**

| Cloning and site-directed mutagenesis         |                                                                 |
|-----------------------------------------------|-----------------------------------------------------------------|
| <i>Arg2</i> _cloning_Forward                  | AAC GAG CTC GCT AGC CTC GAG GAA ATA CTG TAC TCT GGC AC          |
| <i>Arg2</i> _cloning_Reverse:                 | CAG GTC GAC TCT AGA CTC GAG TAT GAT ATA CTA AGG TAA TAA ATG     |
| pmir_seq_Forward:                             | GTG GTG TTG TGT TCG TGG AC                                      |
| pmir_seq_Reverse:                             | CAG CCA ACT CAG CTT CCT TT                                      |
| T7 promoter primer (Reverse) for pCMV-SPORT6: | TAA TAC GAC TCA CTA TAG GG                                      |
| SP6 promoter (forward) for pCMV-SPORT6:       | ATT TAG GTG ACA CTA TAG                                         |
| H145F_Forward                                 | CAG ATC TCT GTG TCA TCT GGG TTG ATG CTT TCG CGG ACA TTA ATA CAC |
| H145F_Reverse                                 | GTG TAT TAA TGT CCG CGA AAG CAT CAA CCC AGA TGA CAC AGA GAT CTG |
| ASO_forward_WT_Arg2                           | TCA TCT GGG TTG ATG CTC AT                                      |
| ASO_forward_H145F_Arg2                        | TCA TCT GGG TTG ATG CTT TC                                      |
| RT-PCR                                        |                                                                 |
| Mouse_ <i>Arg1</i> Forward                    | GTG AAG AAC CCA CGG TCT GT                                      |
| Mouse_ <i>Arg1</i> Reverse                    | CTG GTT GTC AGG GGA GTG TT                                      |
| Mouse_ <i>Arg2</i> Forward                    | GGA TCC AGA AGG TGA TGG AA                                      |
| Mouse_ <i>Arg2</i> Reverse                    | AGA GCT GAC AGC AAC CCT GT                                      |
| Mouse_ <i>Il18</i> Forward                    | CAA CCA ACA AGT GAT ATT CTC CAT G                               |
| Mouse_ <i>Il18</i> Reverse                    | GAT CCA CAC TCT CCA GCT GCA                                     |
| Mouse_ <i>Il10</i> Forward                    | CAG AGA AGC ATG GCC CAG AA                                      |
| Mouse_ <i>Il10</i> Reverse                    | AGA AAT CGA TGA CAG CGC CT                                      |
| Mouse_ <i>Stat3</i> Forward                   | TCG CTC ACG TTT GAC ATG GA                                      |
| Mouse_ <i>Stat3</i> Reverse                   | CTT CTG CTC TCA GCC CCA TC                                      |
| Mouse_ <i>18s</i> Forward                     | GTA ACC CGT TGA ACC CAT T                                       |
| Mouse_ <i>18s</i> Reverse                     | CGA ATC GAA TCG GTA GTA GCG                                     |
| Human_ <i>Arg2</i> _Forward                   | TCA GTG CTG CGG ATC ATG T                                       |
| Human_ <i>Arg2</i> _Reverse                   | CAC TCC TTT TCT TTT CTG CCC TT                                  |
| Human_ <i>Arg1</i> _Forward                   | ACA AAA CAG GGC TAC TCT CAG G                                   |
| Human_ <i>Arg1</i> _Reverse                   | CGA GCA AGT CCG AAA CAA GC                                      |
| Human_ <i>18s</i> _Forward                    | GGC GCC CCC TCG ATG CTC TTA G                                   |
| Human_ <i>18s</i> _Reverse                    | GCT CGG GCC TGCTTT GAA CAC TCT                                  |

Supplementary Table 3. List of Chemical Reagents

| Chemical                                                                    | Catalogue        | Company           |
|-----------------------------------------------------------------------------|------------------|-------------------|
| 1-STEP Ultra TMB ELISA Substrate                                            | 34029            | ThermoFisher      |
| Adenosine 5-diphosphate sodium salt                                         | A2754            | Sigma             |
| 2,6-Dichlorophenolindophenol (DCPIP)                                        | D1878            | Sigma             |
| 3-(4,5-dimethylthiazol-2-yl)-2,5-diphenyltetrazolium bromide (MTT formazan) | M2003            | Sigma             |
| 20X LumiGLO® Reagent and 20X Peroxide                                       | 7003S            | CST               |
| Acetyl CoA                                                                  | A2056            | Sigma             |
| Agarose UltraPure™                                                          | 16500100         | Invitrogen        |
| Agarose gel loading dye (6X) glycerol based, Xylene Cyanol FF free          | 15480157         | Sigma             |
| Ampicillin sodium salt                                                      | A9518            | Sigma             |
| Atpenin A5                                                                  | 11898            | Cayman Chemicals  |
| BOLT® SDS Running Buffer (20X)                                              | B0001            | Invitrogen        |
| BOLT® 4-12% Bis-Tris Plus Gels                                              | NW04125BOX       | Invitrogen        |
| Bovine Serum Albumin (BSA)                                                  | A2153            | Sigma             |
| Bromophenol Blue                                                            | B0126            | Sigma             |
| cOmplete™, Mini, EDTA-free Protease Inhibitor Cocktail                      | 4693159001       | Roche             |
| D-(+)-Glucose                                                               | G8769            | Sigma             |
| Decylubiquinone                                                             | D7911            | Sigma             |
| Diethylpyrocarbonate (DEPC) water                                           | AM9920           | ThermoFisher      |
| Digitonin                                                                   | BN2006           | Invitrogen        |
| Dimethyl Sulfoxide (DMSO)                                                   | D2650            | Sigma             |
| D-Mannitol                                                                  | M4125            | Sigma             |
| Dithiothreitol (DTT) molecular biology grade                                | D0632            | Sigma             |
| DTNB                                                                        | 22582            | ThermoFisher      |
| Dulbeccos Modified Eagle Medium High Glucose 4500mg/L, L-glut, SB           | D5796            | Sigma             |
| Dulbeccos Phosphate Buffer Saline (DPBS)                                    | D8537            | Sigma             |
| eBioscience™ Fixable Viability Dye eFluor™ 780                              | 65-0865-14       | Invitrogen        |
| Ethylenediaminetetraacetic acid (EDTA)                                      | E6758            | Sigma             |
| EGTA                                                                        | E3889            | Sigma             |
| Fatty acid-Free Bovine Serum Albumin                                        | A8806            | Sigma             |
| Fetal Bovine Serum (Heat-inactivated) Batch Number #BCBX1241                | F9665            | Sigma             |
| GeneRuler 100 b.p DNA Ladder                                                | SM0243           | ThermoFisher      |
| GeneRuler 1 kb Plus DNA Ladder                                              | SM1334           | ThermoFisher      |
| Glycerol                                                                    | G5516            | Sigma             |
| Glycine                                                                     | G7126            | Sigma             |
| Griess' reagent for nitrite                                                 | G4410            | Sigma             |
| HEPES                                                                       | H0887            | Sigma             |
| KAPA2G Fast HotStart Ready Mix                                              | KK5601           | Invitrogen        |
| LB Broth with agar                                                          | L7025-100TAB     | Sigma             |
| Leupeptin                                                                   | L2884            | Sigma             |
| L-Glutamic Acid                                                             | G1251            | Sigma             |
| L-Glutamine                                                                 | G7513            | Sigma             |
| Lipofectamine® 3000 Transfection Reagent                                    | L3000008         | Invitrogen        |
| Lipopolysaccharide (O111:B4) (Ultrapure for <i>in vivo</i> experiments)     | TLRL3PELPS       | Invivogen         |
| Lipopolysaccharide (O111:B4)                                                | ALX-581-012-L002 | Enzo LifeSciences |
| L-Malic Acid                                                                | M7397            | Sigma             |
| Mannitol                                                                    | M9647            | Sigma             |
| Magnesium Chloride                                                          | M1028            | Sigma             |
| Marvel® skimmed milk powder                                                 | B07P5DZNLN       | Amazon            |
| Methanol                                                                    | 34860            | Sigma             |
| mir155 inhibitor                                                            | 4464084          | ThermoFisher      |
| mirVana miR-155-5p mimic                                                    | 4464066          | ThermoFisher      |
| MitoSOX™                                                                    | M36008           | Invitrogen        |
| MitoTracker Green                                                           | M7514            | Invitrogen        |
| MitoTracker Red CMXRos                                                      | M7512            | Invitrogen        |

|                                                                                              |             |                    |
|----------------------------------------------------------------------------------------------|-------------|--------------------|
| nor-NOHA (acetate)                                                                           | CAY10006861 | Cayman Chemicals   |
| NP-40 Igepal                                                                                 | 18896       | Sigma              |
| Oxaloacetate                                                                                 | O7753       | Sigma              |
| PageRuler Prestained Protein Ladder                                                          | 26619       | Invitrogen         |
| Paraformaldehyde 4%                                                                          | R37814      | Invitrogen         |
| Penicillin/Streptomycin                                                                      | P4333       | Sigma              |
| Pepsatin A                                                                                   | P4265       | Sigma              |
| Phorbol 12-myristate 13-acetate                                                              | P8139       | Sigma              |
| PMSF                                                                                         | P7626       | Sigma              |
| Potassium Phosphate (dibasic)                                                                | P3786       | Sigma              |
| Potassium Phosphate (monobasic)                                                              | P8709       | Sigma              |
| PowerUp™ SYBR® Green Master Mix                                                              | A25776      | Applied Biosystems |
| Pyruvate                                                                                     | S8636       | Sigma              |
| Q5 High-Fidelity DNA Polymerase - 100 Units                                                  | M0491S      | NEB                |
| Recombinant human IL-10                                                                      | 217-IL-005  | R&D Systems        |
| Recombinant mouse IL-10                                                                      | 417-ML-005  | R&D Systems        |
| Red Blood Cell Lysing Buffer Hybri-Max                                                       | R7757       | Sigma              |
| Rnase Inhibitor                                                                              | N8080119    | Applied Biosystems |
| RPMI-1640 medium                                                                             | R8758       | Sigma              |
| SmaI                                                                                         | R0141S      | NEB                |
| Sodium Chloride                                                                              | S7653       | Sigm               |
| Sodium dodecyl sulphate (SDS) 20%                                                            | 05030       | Sigma              |
| Sodium hydroxide (NaOH)                                                                      | 221465      | Sigma              |
| Sodium orthovanadate                                                                         | S6508       | Sigm               |
| Sodium phosphate dibasic heptahydrate (Na <sub>2</sub> HPO <sub>4</sub> • 7H <sub>2</sub> O) | 431478      | Sigma              |
| Sodium phosphate monobasic dihydrate (NaH <sub>2</sub> PO <sub>4</sub> • 2H <sub>2</sub> O)  | 71505       | Sigma              |
| STAT3 Inhibitor V, Stattic                                                                   | 573099      | Sigma              |
| Succinic Acid                                                                                | S9512       | Sigma              |
| Sucrose                                                                                      | S0389       | Sigma              |
| Sulfuric Acid                                                                                | 339741      | Sigma              |
| SYBR™ Safe DNA Gel Stain                                                                     | S33102      | Invitrogen         |
| TaqMan® Fast Advanced Master Mix                                                             | 4444557     | ThermoFisher       |
| TransIT-X2 Dynamic Delivery System                                                           | MIR6003     | Mirus Bio          |
| TRI-Reagent                                                                                  | T9424       | Sigma              |
| Triton X-100                                                                                 | X100        | Sigma              |
| Trizma Base                                                                                  | T1503       | Sigma              |
| Trypan Blue Stain (0.4%)                                                                     | T10282      | Invitrogen         |
| Trypsin-EDTA                                                                                 | T4174       | Sigma              |
| Tween 20                                                                                     | P1379       | Sigma              |
| Ultra Pure™ Agarose                                                                          | 16500100    | Sigma              |
| Ultra Pure™ TAE Buffer                                                                       | 15558042    | Sigma              |
| XF Base Medium (No Phenol Red) DMEM, pH 7.4                                                  | 103575-100  | Agilent            |
| XhoI                                                                                         | R0146S      | NEB                |

Supplementary Table 4. List of used commercial kits

| Commercial kit                                 | Catalogue number          | Company                 |
|------------------------------------------------|---------------------------|-------------------------|
| Accell Mouse Arg1 Set of 4, 2 nmol             | (11846) EQ-043749-00-0002 | Dharmacon               |
| Accell Mouse Arg2 Set of 4, 2 nmol             | (11847) EQ-040721-00-0002 | Dharmacon               |
| Accell Mouse Control siRNA Kit - Red, 5 nmol   | K-005000-R1-02            | Dharmacon               |
| Arginase Assay kit                             | MAK112-1KT                | Sigma                   |
| BCA Assay                                      | 10678484                  | ThermoFisher Scientific |
| CloneEZ® PCR Cloning Kit                       | L00339                    | Genscript               |
| Cytometric Bead Array (CBA)                    | 339199                    | BD Biosciences          |
| Dual-Luciferase Reporter Assay System          | E1910                     | Promega                 |
| DuoSet ELISA IL-1 $\beta$                      | DY401-05                  | R&D Systems             |
| DuoSet ELISA IL-6                              | DY406                     | R&D Systems             |
| DuoSet ELISA IL-10                             | DY417-05                  | R&D Systems             |
| DuoSet ELISA TNF                               | DY410                     | R&D Systems             |
| Fumarate ChromaDazzle Activity Assay           | BA0110                    | AssayGenie              |
| High Capacity cDNA Reverse Transcription Kit   | 4368814                   | Applied Biosystems      |
| Plasmid Midi Kit                               | 12143                     | Qiagen                  |
| QuikChange Lightning site-directed mutagenesis | 210518                    | Agilent                 |
| RNeasy mini kit                                | 74106                     | Qiagen                  |
| Succinate Assay kit                            | ab204718                  | Abcam                   |
| TaqMan MicroRNA Reverse Transcription Kit      | 4366596                   | Applied Biosystems      |
| XF Cell Mito Stress Test Kit                   | 103015-100                | Agilent                 |
| XFe96 Flux Pak mini kit                        | 102601-100                | Agilent                 |
